# Supplementary material for: The J-curve Association between Systolic Blood Pressure and Clinical Outcomes in Ischemic Stroke or TIA: The BOSS Study
Source: PubMed Central journal article supplement (PMC5656684; doi:10.1038/s41598-017-10887-w), 2017-10-25
Supplement: 41598_2017_10887_MOESM1_ESM.pdf [file 41598_2017_10887_MOESM1_ESM.pdf]

**TITLE PAGE**

**TITLE:**

**The J-curve Association between Systolic Blood Pressure and Clinical Outcomes in Ischemic Stroke or TIA: The BOSS Study**

**SHORT TITLE:** Systolic Blood Pressure and Clinical Outcomes

**AUTHOR LIST**

Xuewei Xie, Jie Xu, Hongqiu Gu, Yongli Tao, Pan Chen, Yilong Wang, Yongjun Wang

Table S1. Baseline characteristics of patients included vs. excluded in the study

|                                       | <b>Patients<br/>Included<br/>n=2,337</b> | <b>All other<br/>Patients<br/>n=211</b> | <b>P value</b> |
|---------------------------------------|------------------------------------------|-----------------------------------------|----------------|
| Age                                   |                                          |                                         | 0.3643         |
| <65                                   | 1451 (60.5)                              | 121 (57.3)                              |                |
| ≥65                                   | 946 (39.5)                               | 90 (42.7)                               |                |
| Female                                | 777 (32.4)                               | 68 (32.2)                               | 0.9554         |
| Current or previous smoker            | 1028 (42.9)                              | 96 (45.5)                               | 0.2646         |
| Current or previous drinking          | 748 (31.2)                               | 70 (33.2)                               | 0.5236         |
| Body mass index, mean ± SD            | 24.9±3.4                                 | 24.6±3.6                                | 0.3468         |
| History of stroke                     | 560 (23.4)                               | 58 (27.5)                               | 0.0479         |
| History of TIA                        | 92 (3.8)                                 | 10 (4.7)                                | 0.1413         |
| History of HTN                        | 1689 (70.5)                              | 148 (70.1)                              | 0.9629         |
| History of DM                         | 512 (21.4)                               | 56 (26.5)                               | 0.1129         |
| NIHSS score at admission              |                                          |                                         | 0.0438         |
| ≤4                                    | 1829 (76.3)                              | 138 (65.4)                              |                |
| 5-15                                  | 509 (21.2)                               | 56 (26.5)                               |                |
| DM with discharge diagnosis           | 662 (27.6)                               | 77 (36.5)                               | 0.0057         |
| HTN with discharge diagnosis          | 2062 (86.0)                              | 176 (83.4)                              | 0.3298         |
| Dyslipidemia with discharge diagnosis | 988 (41.2)                               | 95 (45.0)                               | 0.2718         |
| CHD with discharge diagnosis          | 307 (12.8)                               | 21 (10.0)                               | 0.2338         |
| AF with discharge diagnosis           | 94 (3.9)                                 | 10 (4.7)                                | 0.5559         |
| Secondary prevention                  |                                          |                                         |                |
| antiplatelet                          | 2245 (93.7)                              | 189 (89.6)                              | 0.3820         |
| anti-hypertension                     | 1601 (66.8)                              | 130 (61.6)                              | 0.6481         |
| lowering-lipid                        | 2023 (84.4)                              | 173 (82.0)                              | 0.3219         |
| Antidiabetic                          | 490 (20.4)                               | 57 (27.0)                               | 0.0064         |

DM indicates Diabetes mellitus; HTN, hypertension; CHD, Coronary Heart Disease; AF, Atrial fibrillation.
